# Supplementary material for: Modular structure within groups causes information loss but can improve decision accuracy
Source: PubMed Central journal article supplement (PMC6553586; doi:10.1098/rstb.2018.0378), 2019-04-22

A

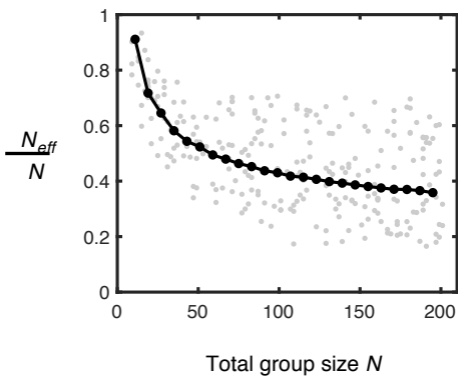

B

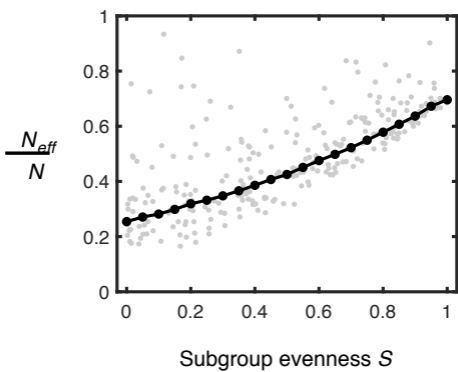

C

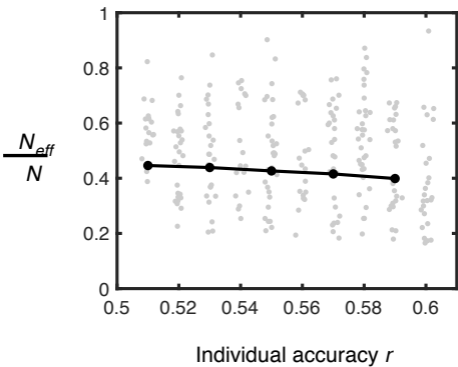

Supplement: rstb20180378supp1.pdf [file rstb20180378supp1.pdf]
